# Supplementary material for: Therapeutic potential of tranilast for the treatment of chronic graft-versus-host disease in mice
Source: PLOS journal article supplement (doi:10.1371/journal.pone.0203742), 2018-10-11

**S5 Fig.**

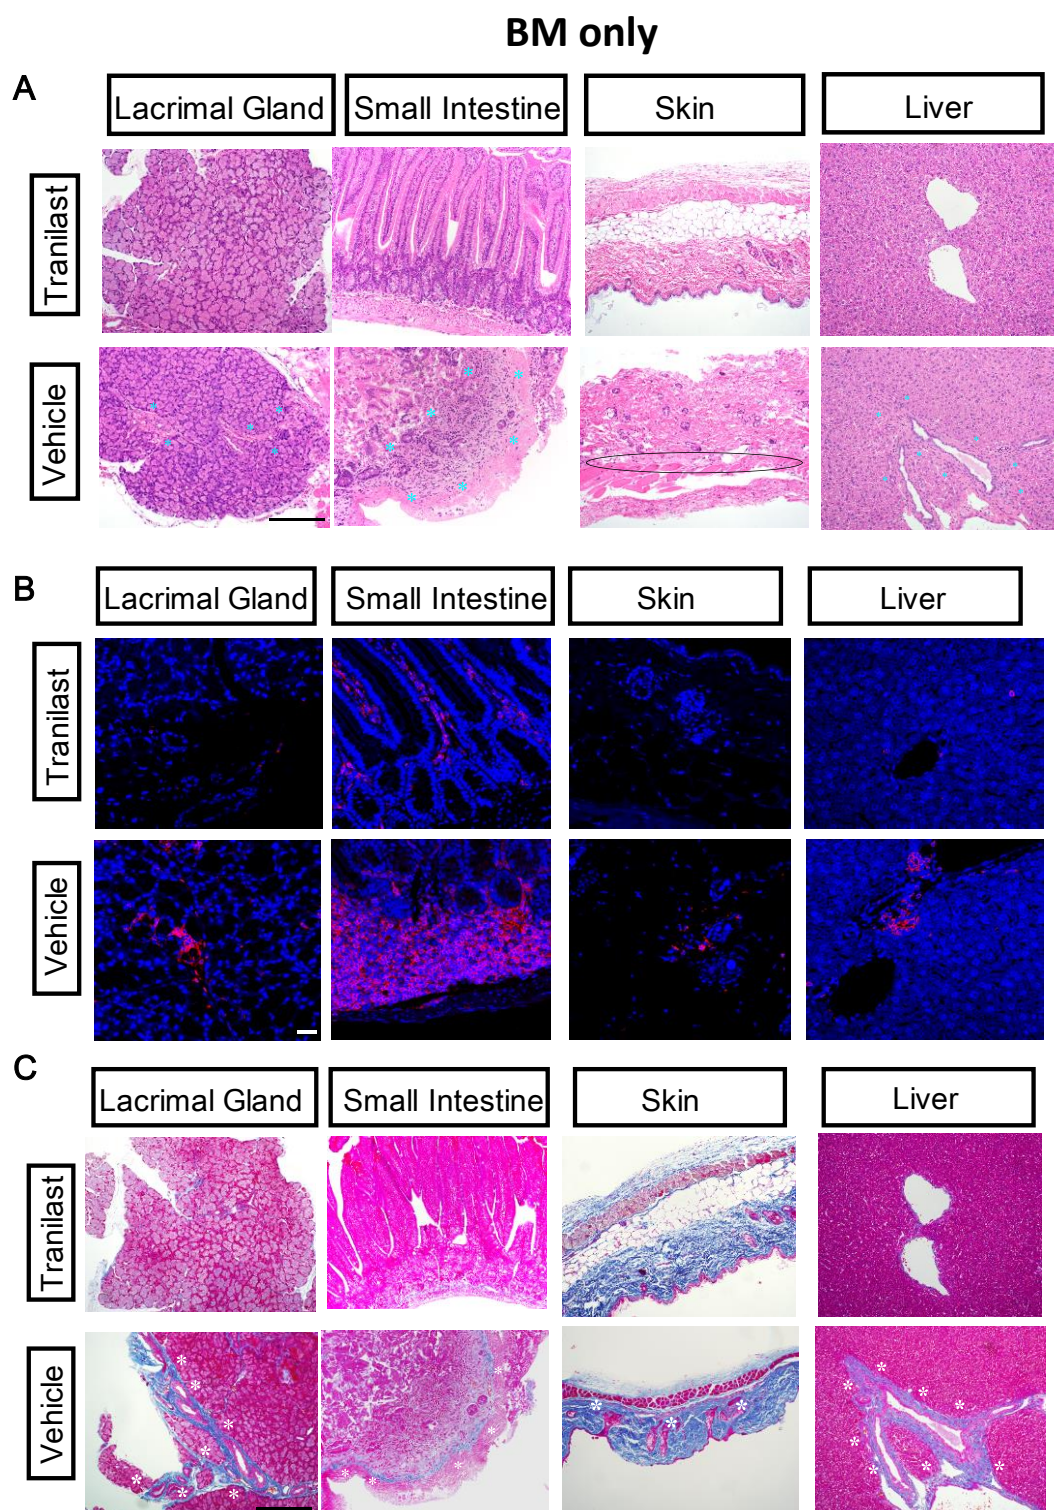

Supplement: S6 (10.1371/journal.pone.0203742.s006) [file journal.pone.0203742.s006]
